# Supplementary material for: Reversible controlled morphologies switching between porous microspheres and urchin-like microcrystals for NaDC/RhB self-assembly and their multifunctional applications
Source: Royal Society of Chemistry journal article supplement (doi:10.1039/c6tc02329k), 2016-01-01
Supplement: c6tc02329k1.pdf [file c6tc02329k1.pdf]

# Reversible Controlled Morphologies Switching between Porous Microspheres and Urchin-like Microcrystals for NaDC/RHB Self-Assembly and Their Multifunctional Applications

Zhaohua Song, Xia Xin\*, Jinglin Shen, Han Zhang, Shubin Wang, Yanzhao Yang\*

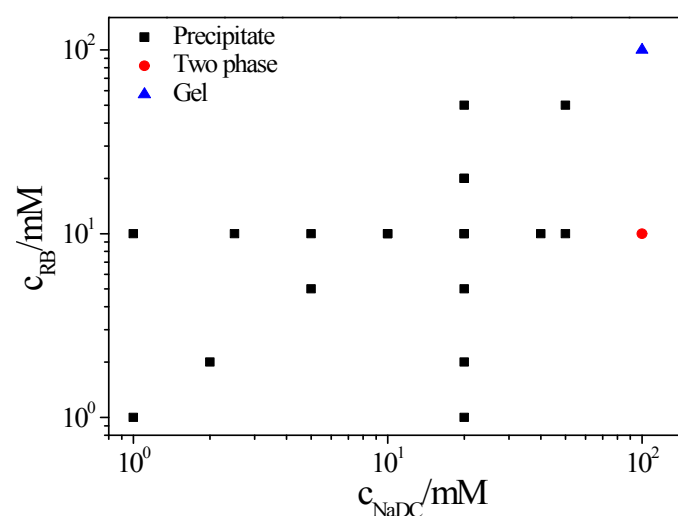

Figure S1 The phase behavior of NaDC/RhB mixed system.

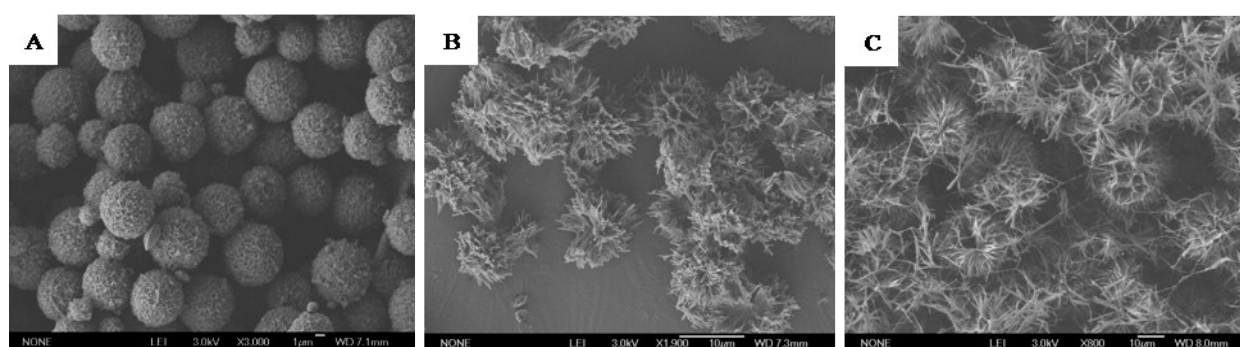

Figure S2 SEM image of the morphologies of precipitate of NaDC/RhB systems: (A)  $10 \text{ mmol L}^{-1}$  NaDC/ $10 \text{ mmol L}^{-1}$  RhB; (B)  $20 \text{ mmol L}^{-1}$  NaDC/ $10 \text{ mmol L}^{-1}$  RhB; (C)  $50 \text{ mmol L}^{-1}$  NaDC/ $10 \text{ mmol L}^{-1}$  RhB.

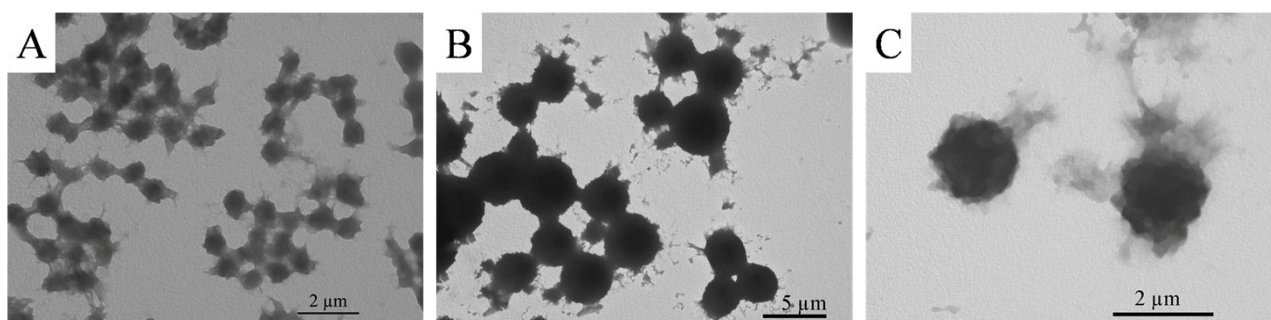

Figure S3 TEM images of NaDC/RhB system when the ratio of NaDC and RhB was fixed at 1:1 (A: 5 mmol L<sup>-1</sup> NaDC/5 mmol L<sup>-1</sup> RhB (0.7~1 μm); B: 10 mmol L<sup>-1</sup> NaDC/10 mmol L<sup>-1</sup> RhB (3.5-4.5 μm); C: 20 mmol L<sup>-1</sup> NaDC/20 mmol L<sup>-1</sup> RhB (2-2.5 μm)).

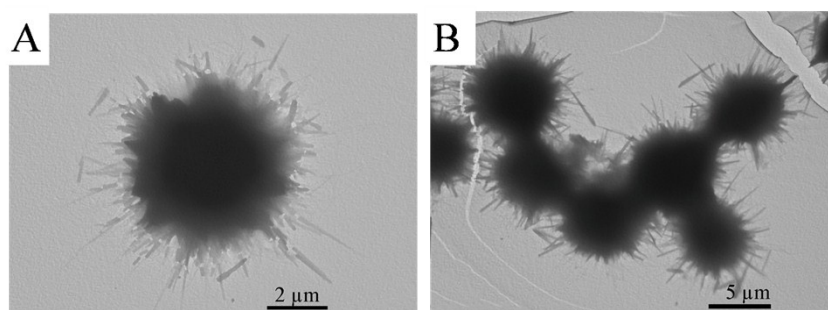

Figure S4 TEM images of NaDC/RhB system when the ratio of NaDC and RhB was fixed at 2:1 (A: 10 mmol L<sup>-1</sup> NaDC/5 mmol L<sup>-1</sup> RhB (7~7.5 μm); B: 20 mmol L<sup>-1</sup> NaDC/10 mmol L<sup>-1</sup> RhB (6-10.5 μm)).

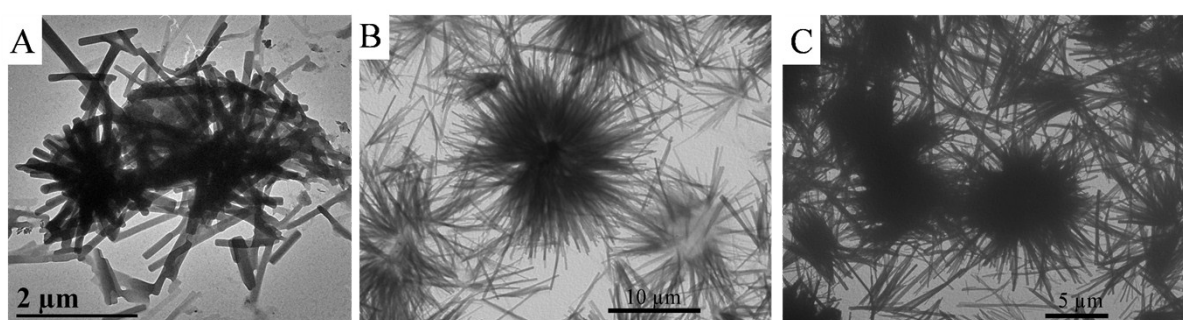

Figure S5 TEM images of NaDC/RhB system when the ratio of NaDC and RhB was fixed at 5:1 (A: 5 mmol L<sup>-1</sup> NaDC/1 mmol L<sup>-1</sup> RHB (3.7~5.7 μm); B: 20 mmol L<sup>-1</sup> NaDC/4 mmol L<sup>-1</sup> RhB (13.5-15.7 μm); C: 50 mmol L<sup>-1</sup> NaDC/10 mmol L<sup>-1</sup> RhB (20.5-23.6 μm)).

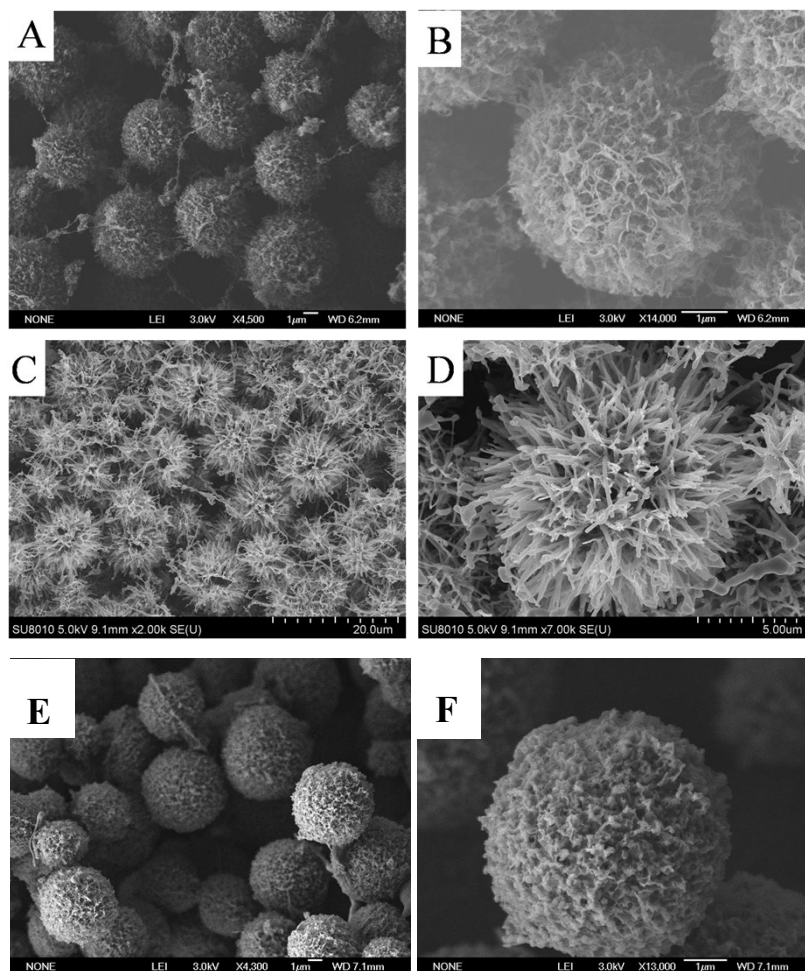

Figure S6 SEM image of the morphologies of precipitate before (A, B) and after (C, D) the addition of  $40 \text{ mmol L}^{-1}$  NaDC and then (E, F)  $40 \text{ mmol L}^{-1}$  RhB to  $10 \text{ mmol L}^{-1}$  NaDC/ $10 \text{ mmol L}^{-1}$  RhB system. The final concentration of NaDC and RhB is  $50 \text{ mmol L}^{-1}$  NaDC/ $50 \text{ mmol L}^{-1}$  RhB.

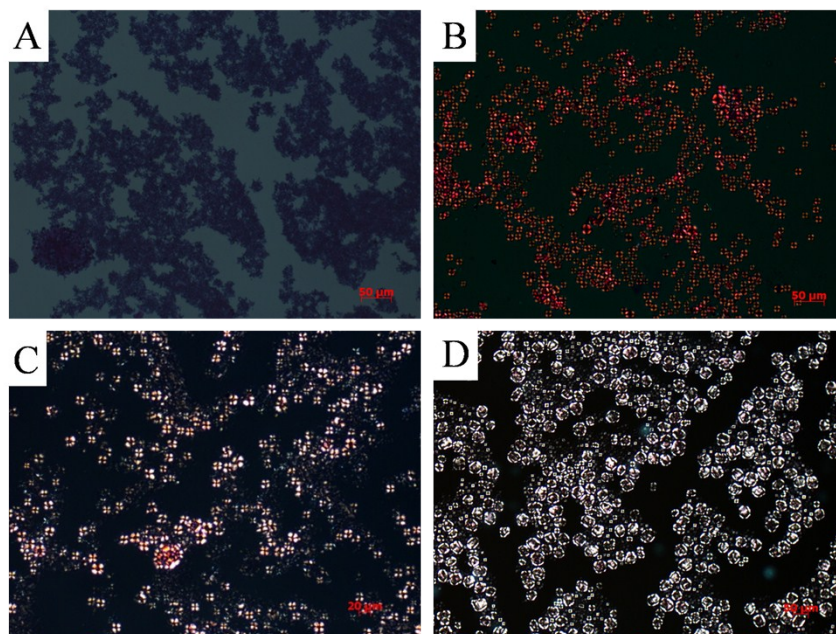

Figure S7 POM image of the precipitates of NaDC/RhB systems: (A) 10 mmol L<sup>-1</sup> NaDC/10 mmol L<sup>-1</sup> RhB; (B) 20 mmol L<sup>-1</sup> NaDC/10 mmol L<sup>-1</sup> RhB; (C) 50 mmol L<sup>-1</sup> NaDC/10 mmol L<sup>-1</sup> RhB; (D) 50 mmol L<sup>-1</sup> NaDC/10 mmol L<sup>-1</sup> RhB/NaOH.

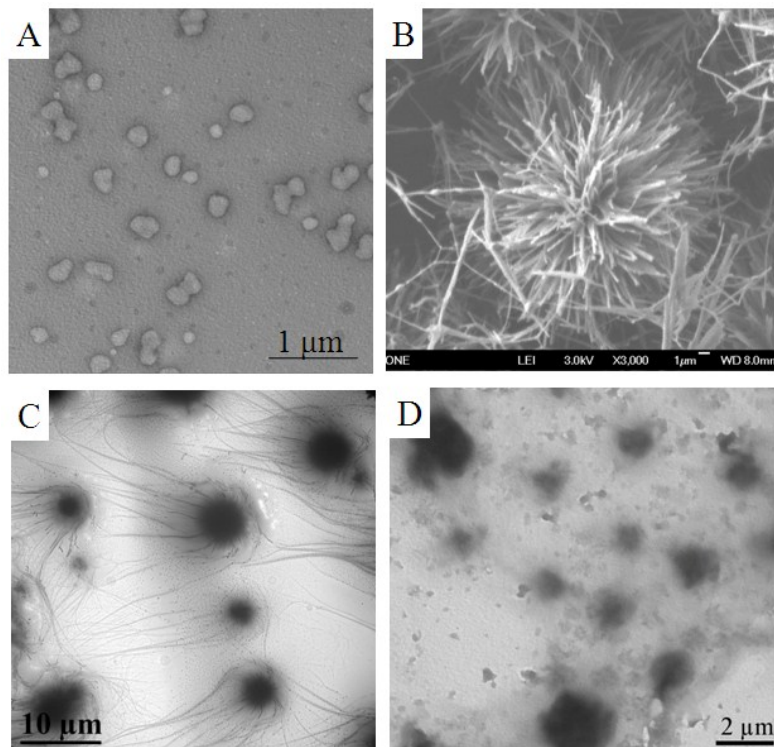

Figure S8 The morphologies of precipitates of 50 mmol L<sup>-1</sup> NaDC/10 mmol L<sup>-1</sup> RhB when the pH of the systems were pH = 12 (A); 7.8 (B); 7.2 (C); 6.7 (D).

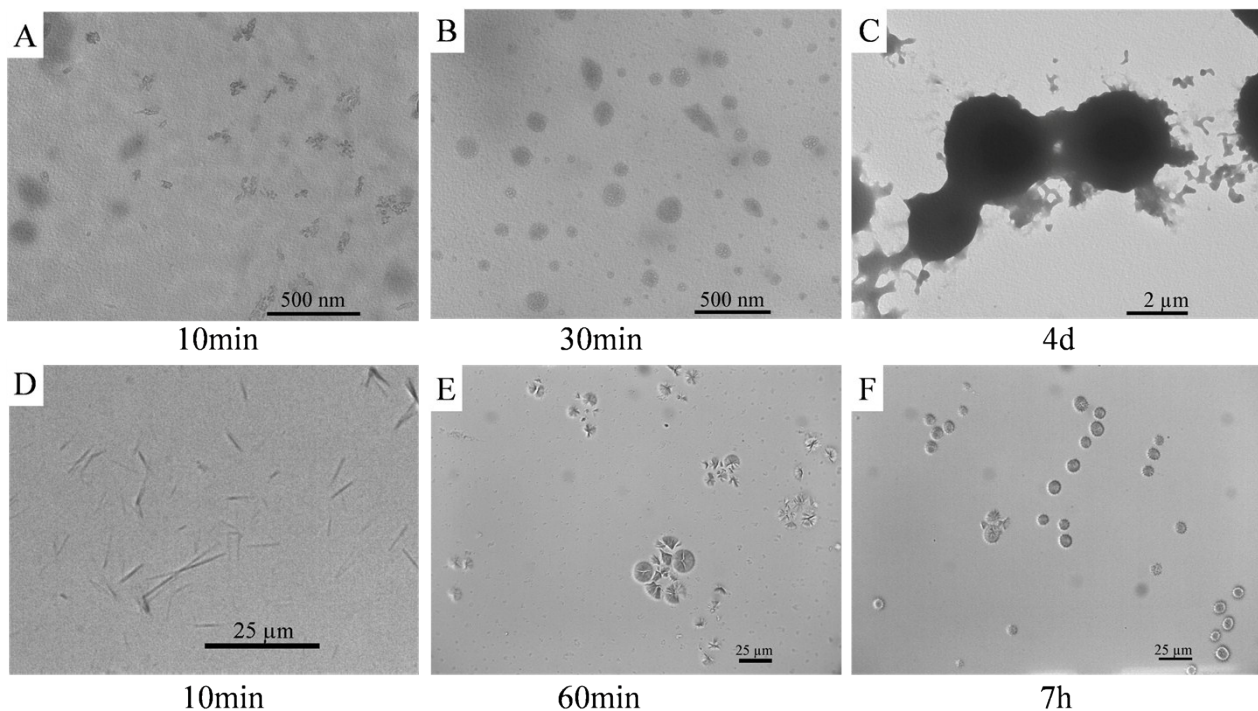

Figure S9 The variation of the morphologies with the aging time for the samples of  $10 \text{ mmol L}^{-1}$  NaDC/ $10 \text{ mmol L}^{-1}$  RhB(A,B,C) and  $50 \text{ mmol L}^{-1}$  NaDC/ $10 \text{ mmol L}^{-1}$  RhB(D, E, F).

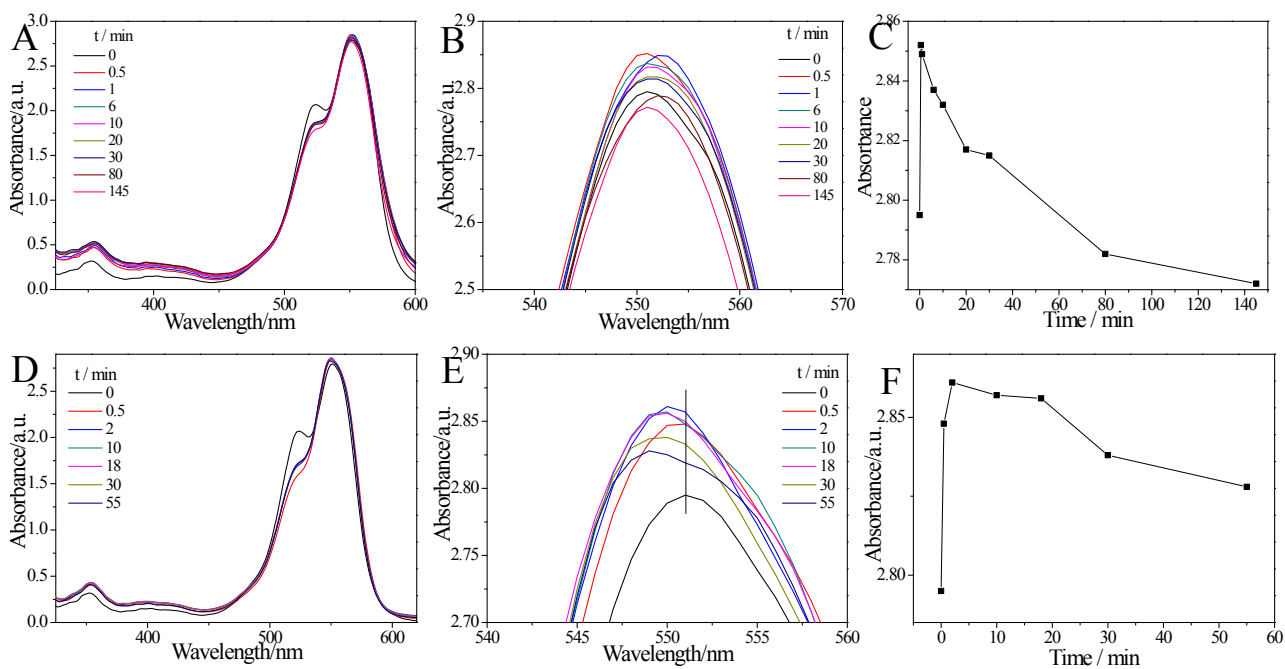

Figure S10 The UV/Vis spectroscopy on time-dependent of the formation of samples of  $10 \text{ mmol L}^{-1}$  NaDC/  $10 \text{ mmol L}^{-1}$  RhB (A, B) and  $50 \text{ mmol L}^{-1}$  NaDC/  $10 \text{ mmol L}^{-1}$  RhB (D, E) by changes in

the intensities of typical absorption peaks at about 551 nm. (C, F) Plot of maximum absorption intensity at about 551 nm versus time.

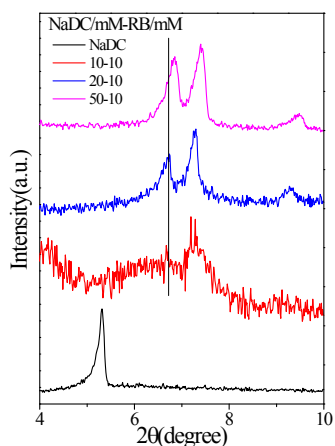

Figure S11 XRD patterns of the NaDC powder and co-assembled structures of NaDC and RhB at a small angle with  $2\theta$  from  $4^\circ$  to  $10^\circ$ .

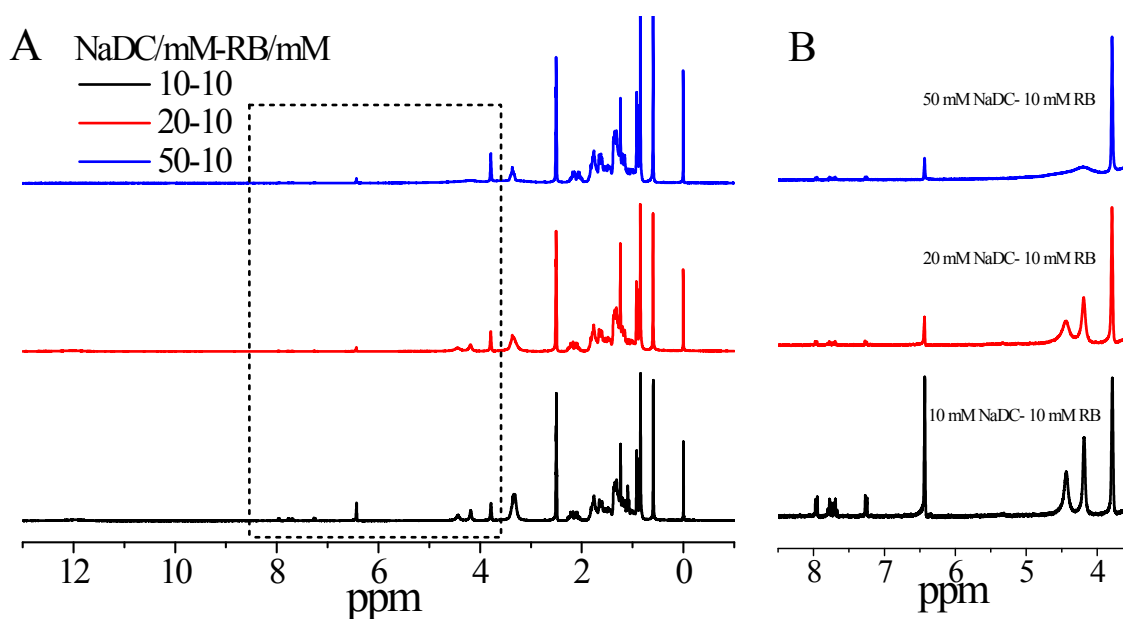

Figure S12 (A):  $^1\text{H}$ NMR spectrum of NaDC-RhB complexes in  $[\text{D}_6]\text{DMSO}$ . (B) is the enlarged part of dashed box of (A).

$^1\text{H}$ NMR (300 MHz,  $\text{DMSO-d}_6$ , ppm): 0.59 (s, 3H,  $\text{CH}_3$ ), 0.84 (s, 3H,  $\text{CH}_3$ ), 0.90–0.92 (d, 3H,  $\text{CH}_3$ ), 1.0–1.85 (m, 24H,  $\text{CH}_2$ , CH), 2.03–2.27 (m, 2H,  $\text{CH}_2$ ), 3.78 (s, 1H, CH), 4.18 (s, 1H, CH), 7.95–7.97 (t, 1H, Ar-H), 7.797–7.668 (q, 2H, Ar-H), 7.245–7.270 (t, 1H, Ar-H).

Table S1 Fluorescence lifetimes obtained with two-exponential fit of the fluorescence decay curves of the RhB alone, 10 mmol L<sup>-1</sup> NaDC/10 mmol L<sup>-1</sup> RhB, 20 mmol L<sup>-1</sup> NaDC/10 mmol L<sup>-1</sup> RhB, 50 mmol L<sup>-1</sup> NaDC/10 mmol L<sup>-1</sup> RhB, respectively.

| Sample                                                   | $\tau_1/\text{ns}$ (%) | $\tau_2/\text{ns}$ (%) | $\tau_3/\text{ns}$ (%) | $\tau/\text{ns}$<br>average |
|----------------------------------------------------------|------------------------|------------------------|------------------------|-----------------------------|
| RhB                                                      | 0.1906(55.46)          | 0.6794(30.24)          | 2.2332(14.31)          | 0.630728                    |
| 10 mmol L <sup>-1</sup> NaDC/10 mmol L <sup>-1</sup> RhB | 0.22(67.59)            | 0.78(23.51)            | 2.77(8.89)             | 0.5783                      |
| 20 mmol L <sup>-1</sup> NaDC/10 mmol L <sup>-1</sup> RhB | 0.7091(74.32)          | 3.0839(25.68)          |                        | 1.318948                    |
| 50 mmol L <sup>-1</sup> NaDC/10 mmol L <sup>-1</sup> RhB | 0.9784(49.65)          | 3.4939(50.35)          |                        | 2.24495                     |
